# Supplementary material for: Modulating mitofusins to control mitochondrial function and signaling
Source: PubMed Central journal article supplement (PMC9262907; doi:10.1038/s41467-022-31324-1), 2022-07-07
Supplement: 41467_2022_31324_MOESM3_ESM.pdf [file 41467_2022_31324_MOESM3_ESM.pdf]

## Reporting Summary

Nature Portfolio wishes to improve the reproducibility of the work that we publish. This form provides structure for consistency and transparency in reporting. For further information on Nature Portfolio policies, see our [Editorial Policies](#) and the [Editorial Policy Checklist](#).

### Statistics

For all statistical analyses, confirm that the following items are present in the figure legend, table legend, main text, or Methods section.

n/a Confirmed

- The exact sample size ( $n$ ) for each experimental group/condition, given as a discrete number and unit of measurement
- A statement on whether measurements were taken from distinct samples or whether the same sample was measured repeatedly
- The statistical test(s) used AND whether they are one- or two-sided  
*Only common tests should be described solely by name; describe more complex techniques in the Methods section.*
- A description of all covariates tested
- A description of any assumptions or corrections, such as tests of normality and adjustment for multiple comparisons
- A full description of the statistical parameters including central tendency (e.g. means) or other basic estimates (e.g. regression coefficient) AND variation (e.g. standard deviation) or associated estimates of uncertainty (e.g. confidence intervals)
- For null hypothesis testing, the test statistic (e.g.  $F$ ,  $t$ ,  $r$ ) with confidence intervals, effect sizes, degrees of freedom and  $P$  value noted  
*Give  $P$  values as exact values whenever suitable.*
- For Bayesian analysis, information on the choice of priors and Markov chain Monte Carlo settings
- For hierarchical and complex designs, identification of the appropriate level for tests and full reporting of outcomes
- Estimates of effect sizes (e.g. Cohen's  $d$ , Pearson's  $r$ ), indicating how they were calculated

*Our web collection on [statistics for biologists](#) contains articles on many of the points above.*

### Software and code

Policy information about [availability of computer code](#)

Data collection

In silico drug screening and molecular dynamics data were collected and analyzed with Schrodinger software suite (Releases 2016-2021, Schrodinger, LLC) and Pymol (Version 2.3, The PyMOL Molecular Graphics System, Schrodinger, LLC). NMR data were collected and processed with Topspin software (Version 2.1, 2016, Bruker). FACS data were collected using the BD FACSDIVA 8.

Data analysis

Data and statistical comparisons were performed by Graph pad Prism 9. NMR data analyzed with qMDD (mddnmr v2.0), NMRPIPE (v.20210129) and analyzed using Analysis CCPNMR (3.0). Structural and small molecule data were analyzed with modules PHASE, EPIC, LIGPREP, MAESTRO, DESMOND using Schrodinger software suite version 2016-2021. Western blot data analyzed with Image Studies 3.1. Imaging data analyzed using FIJI software. FACS data analyzed using FlowJo v 10. Sequencing results were demultiplexed and converted to FASTQ format using Illumina bcl2fastq software. The sequencing reads were adapter and quality trimmed with Trimmomatic and then aligned to the mouse genome (build mm10/GRCm38) using the splice-aware STAR aligner. The featureCounts program was utilized to generate counts for each gene based on how many aligned reads overlap its exons. These counts were then normalized and used to test for differential expression using negative binomial generalized linear models implemented by the DESeq2 1.26.0 package.

For manuscripts utilizing custom algorithms or software that are central to the research but not yet described in published literature, software must be made available to editors and reviewers. We strongly encourage code deposition in a community repository (e.g. GitHub). See the Nature Portfolio [guidelines for submitting code & software](#) for further information.

## Data

Policy information about [availability of data](#)

All manuscripts must include a [data availability statement](#). This statement should provide the following information, where applicable:

- Accession codes, unique identifiers, or web links for publicly available datasets
- A description of any restrictions on data availability
- For clinical datasets or third party data, please ensure that the statement adheres to our [policy](#)

The RNA-seq data generated in this study have been deposited in NCBI Gene Expression Omnibus (GEO) under the accession code GSE186924 [<https://www.ncbi.nlm.nih.gov/geo/query/acc.cgi?acc=GSE186924>]. The following publicly available data sets were used in the production of this manuscript: PDB ID: 6JFL doi:10.2210/pdb6JFL/pdb; 2J69 doi:10.2210/pdb2J69/pdb. 6JFL, 6JFK doi:10.2210/pdb6JFK/pdb, 5GOE doi:10.2210/pdb5GOE/pdb, 1T3J doi:10.2210/pdb1T3J/pdb. All the information generated and analyzed is included in the manuscript and all figures have associated raw data that is provided as an Excel worksheet organized by figures (Data Source file). Source data are provided with this paper.

## Field-specific reporting

Please select the one below that is the best fit for your research. If you are not sure, read the appropriate sections before making your selection.

- Life sciences       Behavioural & social sciences       Ecological, evolutionary & environmental sciences

For a reference copy of the document with all sections, see [nature.com/documents/nr-reporting-summary-flat.pdf](https://nature.com/documents/nr-reporting-summary-flat.pdf)

## Life sciences study design

All studies must disclose on these points even when the disclosure is negative.

|                 |                                                                                                                                                                                                                                                                                                                                                                                                     |
|-----------------|-----------------------------------------------------------------------------------------------------------------------------------------------------------------------------------------------------------------------------------------------------------------------------------------------------------------------------------------------------------------------------------------------------|
| Sample size     | Sample size were designed based on previous experience with assays on related projects (Garner et al. Nat. Chem. Bio. 2019 DOI: 10.1038/s41589-018-0223-0, Amgalan et al. Nat. Cancer 2020 DOI: 10.1038/s43013-020-0039-1) and variability of the response deviating from the mean as presented in the graphs and figure legends. Sample sizes and statistical data are reported in figure legends. |
| Data exclusions | No data were excluded from the analyses.                                                                                                                                                                                                                                                                                                                                                            |
| Replication     | Technical replicates and independent experiments were performed to verify reproducibility of the assays. The experimental findings were reliably reproduced as described in the figure legends. Experimental findings were replicated at least 2 or more times as indicated in the figure legends and replication was successful at all attempts.                                                   |
| Randomization   | Allocation was random. For biochemical and studies in cell culture, treatment groups were attributed randomly between wells and plates to account for well or plate positioning effects.                                                                                                                                                                                                            |
| Blinding        | Blinding was not required for this study as all comparisons were made using quantitative analysis of computational, biochemical, or cellular data with no human or animal subjects.                                                                                                                                                                                                                 |

## Reporting for specific materials, systems and methods

We require information from authors about some types of materials, experimental systems and methods used in many studies. Here, indicate whether each material, system or method listed is relevant to your study. If you are not sure if a list item applies to your research, read the appropriate section before selecting a response.

### Materials & experimental systems

| n/a                                 | Involved in the study                                     |
|-------------------------------------|-----------------------------------------------------------|
| <input type="checkbox"/>            | <input checked="" type="checkbox"/> Antibodies            |
| <input type="checkbox"/>            | <input checked="" type="checkbox"/> Eukaryotic cell lines |
| <input checked="" type="checkbox"/> | <input type="checkbox"/> Palaeontology and archaeology    |
| <input checked="" type="checkbox"/> | <input type="checkbox"/> Animals and other organisms      |
| <input checked="" type="checkbox"/> | <input type="checkbox"/> Human research participants      |
| <input checked="" type="checkbox"/> | <input type="checkbox"/> Clinical data                    |
| <input checked="" type="checkbox"/> | <input type="checkbox"/> Dual use research of concern     |

### Methods

| n/a                                 | Involved in the study                              |
|-------------------------------------|----------------------------------------------------|
| <input checked="" type="checkbox"/> | <input type="checkbox"/> ChIP-seq                  |
| <input type="checkbox"/>            | <input checked="" type="checkbox"/> Flow cytometry |
| <input checked="" type="checkbox"/> | <input type="checkbox"/> MRI-based neuroimaging    |

## Antibodies

|                 |                                                                                                                                                                                                                                                                                         |
|-----------------|-----------------------------------------------------------------------------------------------------------------------------------------------------------------------------------------------------------------------------------------------------------------------------------------|
| Antibodies used | <p><math>\beta</math>-Actin (clone AC-15): (Sigma; Cat. #1978) 1:5000 dilution</p> <p><math>\beta</math>-Tubulin (clone D3U1W): (Cell Signaling Technology; Cat. #86298) 1:1000 dilution</p> <p>Phospho-Histone H2A.X (Ser139) (clone JBW301): (Sigma; Cat. #05-636) 1:100 dilution</p> |
|-----------------|-----------------------------------------------------------------------------------------------------------------------------------------------------------------------------------------------------------------------------------------------------------------------------------------|

Tom20 (clone D8T4N): (Cell Signaling Technology; Cat. #42406) 1:1000 dilution  
 VDAC (clone D73D12): (Cell Signaling Technology; Cat. #4661) 1:1000 dilution  
 Cytochrome c (clone 7H8.2C12, BD): (Fisher Scientific; Cat. # BDB556433) 1:100  
 Mitofusin-2 (clone D2D10): (Cell Signaling Technology; Cat. #9482) 1:500 dilution  
 IRDye® 800CW Goat anti-Rabbit IgG Secondary Antibody: (LI-COR Biosciences; Cat. #926-32211) 1:5000 dilution  
 IRDye® 680RD Goat anti-Mouse IgG Secondary Antibody: (LI-COR Biosciences; Cat. #926-68070) 1:5000 dilution  
 Anti-mouse IgG HRP-linked Antibody: (Cell Signaling Technology; Cat. #7076) 1:2000 dilution  
 Anti-Rabbit IgG HRP-linked Antibody: (Sigma; Cat. #A4914) 1:2000 dilution

## Validation

All antibodies used in this study were from commercial resources and have been validated in the literature and our previous publications. Such information is provided in the manufacturer's website.

β-Actin (clone AC-15), Sample PMID: 33602934  
 β-Tubulin (clone D3U1W), Sample PMID: 34136390  
 Phospho-Histone H2A.X (Ser139) (clone JBW301), Sample PMID: 20440269  
 Tom20 (clone D8T4N), Sample PMID: 35250566  
 VDAC (clone D73D12), Sample PMID: 35271667  
 Cytochrome c (clone 7H8.2C12, BD), Sample PMID: 29017059  
 Mitofusin-2 (clone D2D10), Sample PMID: 33637715  
 IRDye® 800CW Goat anti-Rabbit IgG Secondary Antibody, Sample PMID:31819006  
 IRDye® 680RD Goat anti-Mouse IgG Secondary Antibody, Sample PMID:31819006  
 Anti-mouse IgG HRP-linked Antibody, Sample PMID: 35121725  
 Anti-Rabbit IgG HRP-linked Antibody, Sample PMID: 24959379

## Eukaryotic cell lines

Policy information about [cell lines](#)

## Cell line source(s)

WT, MFN1 KO, MFN2 KO and MFN1/MFN2 DKO Mouse Embryonic Fibroblasts (referred to as WT, MFN1 KO, MFN2 KO, MFN1/MFN2 DKO MEFs) were provided by the laboratory of David Chan. U2OS were provided by the laboratory of Stephen Tait. APAF-1 KO MEFs were provided by Xuejun Jiang's laboratory. DRP1 KO MEFs were generated in house.

## Authentication

Cell lines were authenticated from the providing lab. WT, MFN1 KO, MFN2 KO and MFN1/MFN2 DKO MEFs, APAF-1 KO MEFs, DRP1 KO MEFs were confirmed for lack of expression or expression of the corresponding proteins.

## Mycoplasma contamination

All cell lines were tested negative for mycoplasma contamination.

Commonly misidentified lines  
(See [ICLAC](#) register)

No commonly misidentified lines were used in this study.

## Flow Cytometry

### Plots

Confirm that:

- The axis labels state the marker and fluorochrome used (e.g. CD4-FITC).
- The axis scales are clearly visible. Include numbers along axes only for bottom left plot of group (a 'group' is an analysis of identical markers).
- All plots are contour plots with outliers or pseudocolor plots.
- A numerical value for number of cells or percentage (with statistics) is provided.

### Methodology

## Sample preparation

Annexin V/PI staining was performed according to Dead Cell Apoptosis Kit manual (Invitrogen, V13241). Briefly, MEFs were detached from plates using accutase and centrifuged. Cells were resuspended in 100 µl of IX annexin-binding buffer containing Alexa Fluor 488 Annexin V and incubated for 15 minutes at room temperature in the dark. Subsequently, 400 µl of IX annexin-binding buffer were added. PI was added prior analysis with a LSRII Flow Cytometer.

## Instrument

BD Bioscience LSRII Flow Cytometer

## Software

For data analysis: FlowJo v 10 (Tree Star)  
 For data acquisition: BD FACSDiva 8 software

## Cell population abundance

No cell sorting was performed.

## Gating strategy

After cells were selected in the FSC/SSC dot plot to remove debris, they were gated to exclude cellular aggregates in the FSC/FSC and FSC/SSC dot plots. Gates of PE-Tx-Red-YG+ and FITC+ cells were set and compared with unstained and stained control samples.

- Tick this box to confirm that a figure exemplifying the gating strategy is provided in the Supplementary Information.
